# Supplementary material for: Adsorption of CO2 and N2 in Na–ZSM-5: effects of Na+ and Al content studied by Grand Canonical Monte Carlo simulations and experiments
Source: Springer Nature journal article supplement (doi:10.1007/s10450-013-9560-1), 2013-07-10
Supplement: MOESM2 [file 5360488]

## Sheet: CO2MFI27
273.15	(K)			283.15	(K)			293.15	(K)			308.15	(K)
p (torr)	n (cc/g)	ln(p/n)		p (torr)	n (cc/g)	ln(p/n)		p (torr)	n (cc/g)	ln(p/n)		p (torr)	n (cc/g)	ln(p/n)
0.0859492	11.6159	-4.90637		0.708758	23.1912	-3.48801		0.741617	19.5608	-3.27245		0.7416	12.9485	-2.85992
0.219504	20.4628	-4.53499		1.50715	27.8649	-2.91715		1.50707	23.897	-2.76358		1.51664	17.1862	-2.42761
0.369451	23.0527	-4.13352		2.23663	30.3916	-2.60919		2.25067	26.4591	-2.46437		2.24661	19.6743	-2.16989
0.518648	25.3727	-3.8902		3.00186	32.1728	-2.37189		2.98358	28.2241	-2.24705		3.0011	21.495	-1.96884
0.667628	27.4804	-3.7175		3.74619	33.251	-2.18335		3.73907	29.6379	-2.07022		3.75367	22.9361	-1.80998
0.742887	28.143	-3.63451		5.3819	35.4832	-1.88602		5.28501	31.7808	-1.79399		5.32749	25.008	-1.54631
1.48826	32.158	-3.07305		6.87005	37.0561	-1.68526		6.77123	33.2091	-1.59014		6.75685	26.5475	-1.36838
2.23263	34.4514	-2.73637		7.61848	37.6422	-1.59755		7.64589	33.9687	-1.49127		7.56985	27.3029	-1.28282
2.98326	36.0698	-2.49244		12.4758	40.4977	-1.17745		12.1868	36.814	-1.10553		12.029	30.3197	-0.92448
3.72307	37.2906	-2.30419		21.2705	43.551	-0.716611		20.85	40.0655	-0.653161		20.5134	33.8184	-0.499925
5.2563	39.1768	-2.00866		29.0275	45.3234	-0.445579		28.3199	41.9163	-0.39211		27.7485	35.7812	-0.254241
6.76654	40.5501	-1.79055		37.8168	46.8353	-0.213884		37.002	43.5307	-0.162493		36.3348	37.5205	-0.0321123
7.4839	41.0947	-1.70313		46.8093	48.0639	-0.0264486		46.1395	44.8423	0.0285168		45.4886	38.95	0.155183
12.6005	43.8895	-1.24794		55.6249	49.0469	0.125853		55.0173	45.8894	0.181413		54.4493	40.1058	0.305749
21.5201	46.7924	-0.776733		63.9978	49.8614	0.249602		63.4571	46.7621	0.305291		63.0468	41.0535	0.429001
29.4034	48.5035	-0.500524		72.1529	50.5506	0.355812		71.6256	47.4926	0.410879		71.4529	41.8446	0.535076
38.2566	49.948	-0.266667		80.0437	51.1501	0.447808		79.6206	48.1322	0.503322		79.4843	42.5243	0.625484
47.1914	51.1055	-0.07968		87.8693	51.6859	0.530665		87.4775	48.7048	0.585604		87.3948	43.1302	0.706213
55.8639	52.0436	0.0708374		116.207	53.2893	0.779641		115.557	50.3742	0.830287		115.013	44.8961	0.940692
64.2361	52.8122	0.195823		151.238	54.7933	1.01528		150.529	51.9672	1.06354		150.055	46.579	1.16985
72.3368	53.4698	0.302217		187.363	56.0054	1.2076		186.678	53.2616	1.25417		186.224	47.9647	1.35648
80.2313	54.0405	0.395181		223.174	56.9898	1.36508		222.551	54.32	1.41026		222.266	49.0894	1.51023
88.0443	54.5512	0.4787		258.608	57.8064	1.49821		257.996	55.2051	1.54189		257.602	50.0503	1.63839
116.618	56.0938	0.731877		293.773	58.5064	1.61367		293.192	55.9716	1.65598		293.036	50.8665	1.75109
151.749	57.521	0.970075		328.835	59.1158	1.71606		328.281	56.6364	1.75722		328.071	51.5896	1.84991
187.883	58.6588	1.16408		363.645	59.6629	1.80747		363.132	57.237	1.84757		362.911	52.2349	1.93841
223.596	59.5774	1.32257		398.478	60.1485	1.89084		398.262	57.7525	1.93094		397.841	52.8245	2.01908
258.92	60.3483	1.45639		433.255	60.5836	1.9673		432.628	58.2544	2.00506		432.633	53.3577	2.09287
294.076	61.0052	1.57288		467.956	60.9924	2.03763		467.41	58.7119	2.07457		467.475	53.8453	2.16123
328.981	61.5788	1.67568		502.622	61.3669	2.10297		502.239	59.1198	2.13951		501.98	54.3064	2.22392
363.95	62.0835	1.76854		537.328	61.7038	2.16426		536.808	59.5037	2.1996		536.744	54.7277	2.28315
398.615	62.5454	1.8521		571.863	62.0287	2.2213		571.555	59.8493	2.25653		571.427	55.1317	2.33841
433.439	62.9525	1.92937		606.523	62.322	2.27543		605.989	60.1934	2.3093		606.112	55.5039	2.39061
468.105	63.3328	2.00029		641.125	62.5985	2.32648		640.664	60.507	2.35975		640.629	55.8582	2.43963
502.829	63.6714	2.06651		675.522	62.8716	2.37439		675.266	60.8017	2.40749		675.176	56.2002	2.48605
537.411	63.9902	2.12803		710.391	63.101	2.42108		709.799	61.079	2.45281		709.994	56.5054	2.53092
572.073	64.2859	2.18593		744.353	63.3281	2.46419		744.353	61.334	2.49618		744.353	56.8071	2.57285
606.582	64.5674	2.24013
641.306	64.8199	2.29189
675.822	65.061	2.3406
710.407	65.2812	2.38713
744.353	65.5041	2.4304
		T (°C)	1/T (K)	-ln b
		35	0.00324517	-4.0207					=
		20	0.00341122	-5.1472
		10	0.0035317	-5.9548
		0	0.00366099	-6.1853
	ln p 0°C
q	0	10	20	35
	0.00366099	0.0035317	0.00341122	0.00324517
1	-6.13594	-5.86683	-5.07055	-3.94171		45.2694
2	-5.38974	-5.08407	-4.29858	-3.16773		45.6945
3	-4.92764	-4.58734	-3.81209	-2.67965		46.0906
4	-4.57978	-4.20674	-3.44121	-2.30757		46.4583
5	-4.29298	-3.88904	-3.13275	-1.9983		46.7977
6	-4.04356	-3.61054	-2.86301	-1.72813		47.1093
7	-3.81894	-3.35859	-2.61938	-1.48444		47.3933
8	-3.61161	-3.12566	-2.39433	-1.25972		47.6501
9	-3.41676	-2.90689	-2.18303	-1.0491		47.88
10	-3.23111	-2.69896	-1.98219	-0.849306		48.0833
11	-3.05234	-2.49952	-1.78946	-0.65798		48.2604
12	-2.87876	-2.30682	-1.60312	-0.473401		48.4117
13	-2.70908	-2.11955	-1.42189	-0.294266		48.5373
14	-2.54232	-1.93667	-1.24475	-0.119567		48.6377
15	-2.37772	-1.7574	-1.07092	0.0514877		48.7131
16	-2.21467	-1.58107	-0.899779	0.219532		48.764
17	-2.05268	-1.40716	-0.730809	0.385078		48.7906
18	-1.89136	-1.23523	-0.563598	0.548548		48.7933
19	-1.73038	-1.06492	-0.397805	0.71029		48.7723
20	-1.56948	-0.895924	-0.233143	0.870593		48.7281
21	-1.40843	-0.727981	-0.0693762	1.0297		48.661
22	-1.24707	-0.560871	0.0936973	1.18782		48.5712
23	-1.08524	-0.394404	0.256246	1.34512		48.4591
24	-0.922822	-0.228415	0.418414	1.50176		48.3251
25	-0.759705	-0.0627627	0.580323	1.65786		48.1694
26	-0.59581	0.102679	0.742076	1.81354		47.9925
27	-0.431068	0.268018	0.903762	1.96888		47.7945
28	-0.265424	0.433351	1.06546	2.12396		47.5759
29	-0.0988343	0.598762	1.22722	2.27886		47.337
30	0.0687347	0.764327	1.38911	2.43363		47.0781
31	0.237309	0.930111	1.55118	2.58833		46.7996
32	0.406906	1.09617	1.71345	2.743		46.5017
33	0.577537	1.26257	1.87596	2.89767		46.1848
34	0.749209	1.42934	2.03874	3.05238		45.8492
35	0.921922	1.59652	2.2018	3.20716		45.4953
36	1.09567	1.76417	2.36517	3.36201		45.1233
37	1.27045	1.9323	2.52886	3.51698		44.7337
38	1.44625	2.10095	2.69286	3.67205		44.3267
39	1.62305	2.27014	2.8572	3.82726		43.9026
40	1.80084	2.43991	3.02187	3.9826		43.4619
41	1.97959	2.61026	3.18687	4.13808		43.0048
42	2.15928	2.78121	3.3522	4.29371		42.5316
43	2.3399	2.95279	3.51785	4.44948		42.0427
44	2.5214	3.12501	3.68382	4.60539		41.5384
45	2.70378	3.29787	3.8501	4.76145		41.0191
46	2.88698	3.4714	4.01668	4.91764		40.485
47	3.07099	3.64559	4.18355	5.07396		39.9366
48	3.25576	3.82047	4.35069	5.23041		39.374
49	3.44128	3.99603	4.5181	5.38697		38.7977
50	3.62749	4.17228	4.68575	5.54363		38.208
51	3.81437	4.34922	4.85363	5.70039		37.6052
52	4.00188	4.52686	5.02172	5.85724		36.9896
53	4.18998	4.70521	5.19001	6.01415		36.3616
54	4.37862	4.88426	5.35848	6.17113		35.7215
55	4.56779	5.06402	5.52711	6.32814		35.0696
56	4.75742	5.24448	5.69587	6.48519		34.4062
57	4.94748	5.42564	5.86474	6.64224		33.7318
58	5.13793	5.60752	6.03371	6.7993		33.0465
59	5.32873	5.79009	6.20276	6.95634		32.3508
60	5.51983	5.97337	6.37185	7.11334		31.645

## Sheet: N2MFI27
273.15	(K)			283.15	(K)			293.15	(K)			308.15	(K)
p (torr)	n (cc/g)	ln(p/n)		p (torr)	n (cc/g)	ln(p/n)		p (torr)	n (cc/g)	ln(p/n)		p (torr)	n (cc/g)	ln(p/n)
7.60217	1.0036	2.02484		7.61431	0.663	2.44101		7.59823	0.4539	2.81779		7.60985	0.2635	3.36314
12.0016	1.5382	2.05443		12.8777	1.0942	2.46547		12.5692	0.7373	2.83601		13.5303	0.4625	3.37604
20	2.4624	2.09459		19.7534	1.6336	2.49254		20.5954	1.1798	2.85972		20.7098	0.6999	3.38742
29.1203	3.4367	2.13693		30.9638	2.4747	2.5267		28.6079	1.613	2.87559		30.9863	1.0324	3.40166
37.8169	4.3058	2.17279		36.6816	2.8805	2.54431		36.5763	2.0237	2.89447		39.6754	1.3089	3.41154
42.6823	4.7726	2.19089		43.1595	3.3251	2.5634		44.317	2.4175	2.90863		47.7495	1.5591	3.42186
52.4333	5.6433	2.22907		50.1001	3.7889	2.58195		52.0615	2.7978	2.92359		55.4314	1.796	3.42958
57.7529	6.0957	2.24859		57.2517	4.2598	2.59823		59.9265	3.1644	2.94116		63.0817	2.0246	3.43906
68.0128	6.9274	2.28421		64.8547	4.7277	2.61871		67.3748	3.5216	2.95136		70.5958	2.2477	3.44706
73.4966	7.3419	2.30364		72.4732	5.1847	2.63751		75.0706	3.8697	2.96525		78.1087	2.4691	3.45425
79.7212	7.8047	2.32381		80.1546	5.6307	2.65572		82.9566	4.2054	2.98195		85.7138	2.6846	3.46348
117.745	10.299	2.43647		115.691	7.5234	2.7329		113.779	5.5001	3.02949		118.466	3.591	3.49619
150.236	12.0805	2.52061		152.076	9.183	2.80703		148.477	6.8013	3.08331		153.009	4.4828	3.53025
185.477	13.7546	2.60156		188.244	10.6667	2.87061		183.478	8.012	3.13115		187.929	5.3282	3.56305
221.975	15.2682	2.67679		217.899	11.773	2.91822		219.073	9.1252	3.17837		222.406	6.1235	3.59237
251.9	16.3848	2.73268		252.489	12.9198	2.97261		253.954	10.1499	3.21969		257.535	6.8779	3.62284
286.27	17.5338	2.7928		287.537	13.9955	3.02261		289.36	11.0886	3.26175		292.196	7.5953	3.6499
321.565	18.6098	2.84951		322.589	14.9911	3.06892		324.327	11.9691	3.29942		327.498	8.2725	3.67855
356.82	19.605	2.90145		357.899	15.9143	3.11303		359.064	12.7905	3.3348		361.854	8.9294	3.70189
392.054	20.515	2.95024		393.263	16.7667	3.15508		394.95	13.5462	3.37265		396.654	9.5445	3.7271
427.69	21.3507	2.99731		427.951	17.5636	3.19318		429.169	14.285	3.40264		424.23	10.0016	3.74753
462.414	22.1326	3.03941		463.768	18.3062	3.23214		464.112	14.979	3.43348		464.938	10.6799	3.77354
497.873	22.8705	3.0805		498.914	19.0015	3.26792		498.808	15.624	3.46341		493.154	11.1269	3.79146
533.193	23.5428	3.12006		533.27	19.6666	3.30011		534.511	16.26	3.49264		534.7	11.7502	3.81784
567.487	24.1956	3.15505		568.977	20.2806	3.33417		570.261	16.8512	3.52167		563.28	12.1555	3.83599
602.787	24.813	3.1902		604.547	20.8826	3.36556		596.447	17.2879	3.54098		603.739	12.7311	3.85909
638.802	25.3985	3.2249		639.482	21.462	3.39438		637.818	17.9164	3.57234		632.678	13.1136	3.87631
665.569	25.8277	3.24919		666.549	21.8704	3.41698		666.793	18.3206	3.59445		665.882	13.5452	3.89508
706.6	26.4334	3.28584		707.186	22.4538	3.44983		706.408	18.9124	3.62037		700.413	13.9758	3.91434
735.004	26.8456	3.30977		743.754	22.9948	3.47644		736.578	19.2861	3.64263		734.648	14.4008	3.93211
n(cc/g)	1/T (K)	1/T (K)	1/T (K)	1/T (K)		DH (kJ/mol)
	0.00366099	0.0035317	0.00341122	0.00324517
1	2.03379	2.46709	2.85163	3.39869	1	27.2275
2	2.76729	3.19916	3.58312	4.1289	2	27.1639
3	3.21383	3.64421	4.02746	4.57184	3	27.0942
4	3.54331	3.97213	4.35456	4.89743	4	27.0182
5	3.80897	4.23617	4.61765	5.15889	5	26.9361
6	4.03454	4.46004	4.84045	5.37996	6	26.8477
7	4.23265	4.6564	5.03561	5.57328	7	26.7531
8	4.41086	4.83279	5.2107	5.7464	8	26.6524
9	4.57405	4.9941	5.37056	5.90419	9	26.5454
10	4.72554	5.14363	5.51854	6.04998	10	26.4322
11	4.86769	5.28378	5.657	6.18614	11	26.3128
12	5.00228	5.41628	5.7877	6.31442	12	26.1872
13	5.13061	5.54247	5.91197	6.43616	13	26.0554
14	5.25373	5.66338	6.03083	6.55238	14	25.9174
15	5.37246	5.77983	6.14511	6.66391	15	25.7732
16	5.48745	5.89248	6.25548	6.77141	16	25.6228
17	5.59925	6.00188	6.36246	6.87542	17	25.4661
18	5.70831	6.10846	6.46651	6.97638	18	25.3033
19	5.81499	6.21261	6.56801	7.07466	19	25.1343
20	5.91963	6.31465	6.66726	7.1706	20	24.959
21	6.02248	6.41483	6.76455	7.26446	21	24.7776
22	6.12379	6.51341	6.8601	7.35646	22	24.5899
23	6.22374	6.61057	6.95412	7.44682	23	24.3961
24	6.32253	6.70649	7.04678	7.53571	24	24.196
25	6.4203	6.80134	7.13823	7.62328	25	23.9898

## Sheet: CO2MFI90
273.15	(K)			283.15	(K)			293.15	(K)			308.15	(K)
p (torr)	n (cc/g)	ln(p/n)		p (torr)	n (cc/g)	ln(p/n)		p (torr)	n (cc/g)	ln(p/n)		p (torr)	n (cc/g)	ln(p/n)	FIT
0.215734	3.2272	-2.70532		1.37276	9.5479	-1.9395		1.12757	6.3937	-1.73525		0.573496	3.1632	-1.70759	-1.75347
0.219854	5.9616	-3.30013		1.49636	10.4251	-1.94118		1.49521	7.493	-1.6117		0.545938	3.14	-1.74947	-1.75847
0.372655	7.3077	-2.97603		2.24042	11.6399	-1.64778		2.25219	8.8313	-1.3664		0.534766	3.1279	-1.76629	-1.76108
0.520637	8.3819	-2.77878		2.99447	12.5559	-1.43342		3.00355	9.788	-1.18136		0.531787	3.1271	-1.77162	-1.76125
0.669067	9.1571	-2.6164		3.74705	13.2901	-1.26605		3.77272	10.5319	-1.02661		0.675534	3.5267	-1.65261	-1.67536
0.741923	9.5883	-2.55905		5.26905	14.4818	-1.01104		5.33178	11.7522	-0.790354		0.7448	3.7968	-1.6288	-1.61762
1.49419	11.7365	-2.06112		6.78373	15.4069	-0.820289		6.83062	12.6512	-0.616337		1.49705	5.4414	-1.29054	-1.27214
2.23747	13.0658	-1.76465		7.61215	15.8737	-0.734917		7.60098	13.04	-0.539744		2.2493	6.5498	-1.06882	-1.04586
3.00158	14.0966	-1.54679		12.6612	18.059	-0.3551		12.908	15.1979	-0.163312		2.9941	7.3891	-0.903364	-0.878409
3.74596	14.8995	-1.38065		21.0493	20.6214	0.0205386		21.5346	17.5914	0.202252		3.75379	8.0736	-0.765833	-0.744489
5.22693	16.2039	-1.13143		27.9789	22.2659	0.228393		28.8101	19.1202	0.409982		5.26574	9.1576	-0.553363	-0.537539
6.73618	17.2652	-0.9412		35.7838	23.8369	0.40626		36.8626	20.5448	0.58459		6.77023	9.9958	-0.38963	-0.382029
7.4944	17.7284	-0.861012		44.0597	25.2739	0.555773		45.163	21.8273	0.727117		7.448	10.3433	-0.328393	-0.318752
12.5342	20.1871	-0.47658		52.3372	26.5724	0.677834		53.5423	22.9644	0.846527		12.2892	12.1548	0.0109967	-0.000682814
20.7299	23.0995	-0.108232		60.5763	27.7401	0.781025		61.7613	23.9773	0.94617		19.8862	14.1102	0.343126	0.319537
31.5505	25.9459	0.195577		68.6675	28.807	0.868658		69.8251	24.897	1.03125		28.3769	15.7147	0.590978	0.563697
37.5076	27.2833	0.318269		76.6824	29.7805	0.945818		77.7564	25.7392	1.10557		37.3145	17.0766	0.781672	0.75755
44.5226	28.6791	0.439828		84.5869	30.6845	1.01402		85.5589	26.5204	1.17129		46.1776	18.2191	0.930024	0.910656
52.059	30.0542	0.549375		117.109	33.9331	1.23872		118.69	29.4045	1.39537		54.7428	19.1857	1.04848	1.03344
59.9011	31.3586	0.647206		152.691	36.8161	1.42248		154.454	31.995	1.57432		62.9356	20.0333	1.14472	1.13607
67.8689	32.5722	0.734119		188.8	39.302	1.56941		189.987	34.1841	1.7152		71.0539	20.788	1.22906	1.22354
75.8765	33.7055	0.811446		224.279	41.3914	1.68982		217.923	35.7228	1.80835		78.9488	21.4814	1.30161	1.30071
83.8876	34.7461	0.88141		252.639	42.8513	1.77423		259.485	37.7363	1.92808		86.3968	22.1204	1.36245	1.36915
116.044	38.3923	1.10611		293.567	44.7668	1.88064		288.639	39.0062	2.00146		120.658	24.5784	1.59109	1.60953
151.644	41.6093	1.29321		323.478	45.9643	1.95127		322.534	40.3549	2.0785		156.408	26.6886	1.76823	1.78895
188.199	44.3006	1.4465		357.41	47.2203	2.02406		357.497	41.634	2.15021		183.966	28.1699	1.87649	1.90168
224.159	46.487	1.57318		392.56	48.3835	2.09353		392.82	42.7897	2.21705		225.674	30.1033	2.01446	2.0347
252.521	47.9805	1.6607		427.65	49.4581	2.15718		427.964	43.8549	2.27815		254.722	31.3328	2.09551	2.1123
294.006	49.8698	1.77418		462.773	50.4413	2.21643		462.999	44.8453	2.33451		288.982	32.6363	2.18094	2.18984
323.86	51.0361	1.84778		497.728	51.344	2.27151		497.973	45.7591	2.38716		323.243	33.8762	2.25569	2.26014
357.94	52.2438	1.92444		532.958	52.1532	2.32426		533.088	46.5887	2.43733		358.994	35.0293	2.32712	2.32351
393.272	53.3467	1.99769		567.63	52.9359	2.37239		567.999	47.3647	2.48424		393.999	36.0989	2.39009	2.3814
428.513	54.3362	2.06513		602.93	53.6304	2.41969		602.63	48.1096	2.52782		429.005	37.0832	2.4483	2.43465
463.33	55.2658	2.12628		637.254	54.3108	2.46244		637.53	48.8054	2.56976		463.266	38.0209	2.50016	2.48599
498.778	56.0854	2.18528		672.544	54.9065	2.50544		672.248	49.4555	2.60955		498.271	38.8983	2.55019	2.53511
533.94	56.8175	2.24044		707.109	55.4854	2.54506		707.024	50.0639	2.64777		533.277	39.7084	2.59748	2.58186
568.569	57.5149	2.29108		741.748	56.0375	2.58299		741.663	50.6414	2.68413		568.282	40.475	2.64193	2.62773
603.481	58.1566	2.33958										603.288	41.2124	2.68366	2.6737
638.22	58.7639	2.38516										637.549	41.917	2.72194	2.71963
673.207	59.3057	2.42935										672.554	42.5744	2.75983	2.76454
707.81	59.8297	2.47067										707.56	43.1916	2.79618	2.80874
742.52	60.3231	2.51033										741.821	43.7984	2.82951	2.85434
n(cc/g)	1/T (K)	1/T (K)	1/T (K)	1/T (K)		DH (kJ/mol)
	0.00366099	0.0035317	0.00341122	0.00324517
5	-1.95066	-1.7477	-0.429562	0.245658		47.7721
6	-1.5311	-1.25948	-0.0686919	0.634363		46.4936
7	-1.14144	-0.814219	0.269467	0.990305		45.2728
8	-0.775247	-0.403837	0.590292	1.32067		44.1092
9	-0.428617	-0.0229476	0.896715	1.63		43.0016
10	-0.0990961	0.332284	1.19034	1.92133		41.9487
11	0.214927	0.664731	1.47202	2.19676		40.9491
12	0.514546	0.976642	1.74221	2.45783		40.001
13	0.800532	1.26983	2.00112	2.70569		39.1027
14	1.07345	1.54583	2.24883	2.9412		38.2522
15	1.33376	1.80591	2.48539	3.16509		37.4474
16	1.58181	2.05122	2.71087	3.37792		36.6863
17	1.81795	2.28275	2.92534	3.58019		35.9668
18	2.04248	2.50141	3.12892	3.77234		35.2868
19	2.25573	2.70802	3.32181	3.95477		34.6442
20	2.45802	2.90333	3.50424	4.12786		34.037
21	2.64969	3.08807	3.67654	4.29198		33.4634
22	2.83111	3.26288	3.83908	4.44749		32.9216
23	3.00265	3.42839	3.99228	4.59477		32.4101
24	3.16474	3.58518	4.13664	4.73419		31.9274
25	3.31781	3.73383	4.27268	4.86615		31.4726
26	3.46231	3.87487	4.40098	4.99105		31.0447
27	3.59873	4.00882	4.52215	5.10934		30.643
28	3.72757	4.13616	4.63683	5.22147		30.2675
29	3.84934	4.25738	4.74567	5.3279		29.9183
30	3.96457	4.37294	4.84933	5.42915		29.5957
31	4.07381	4.48328	4.94848	5.52575		29.3009
32	4.1776	4.58884	5.04377	5.61826		29.0351
33	4.2765	4.69002	5.13584	5.70726		28.8003
34	4.37106	4.78725	5.2253	5.79338		28.5989
35	4.46183	4.8809	5.31273	5.87726		28.4338
36	4.54936	4.97137	5.39866	5.95958		28.3086
37	4.63417	5.05902	5.48357	6.04105		28.2275
38	4.71679	5.14422	5.56786	6.12242		28.1952
39	4.7977	5.22731	5.65186	6.20446		28.2174
40	4.8774	5.30865	5.73584	6.28798		28.3
41	4.95632	5.38855	5.81995	6.37382		28.4503
42	5.03488	5.46735	5.90425	6.46286		28.6757
43	5.11347	5.54535	5.98867	6.556		28.985
44	5.19241	5.62287	6.07304	6.65418		29.3874
45	5.27202	5.70021	6.15703	6.75839		29.8932
46	5.35254	5.77764	6.2402	6.86962		30.5137
47	5.43417	5.85545	6.32192	6.98893		31.2607
48	5.51705	5.93391	6.40142	7.11739		32.1475
49	5.60125	6.01329	6.47777	7.25612		33.188
50	5.68679	6.09385	6.54981	7.40625		34.3974
51	5.77361	6.17582	6.61624	7.56897		35.7918
52	5.86159	6.25946	6.67552	7.7455		37.3885
53	5.95051	6.345	6.72592	7.93709		39.2058
54	6.04009	6.43266	6.76547	8.14501		41.2633
55	6.12994	6.52266	6.79198	8.3706		43.5817

## Sheet: N2MFI90
273.15	(K)			283.15	(K)			293.15	(K)			308.15	(K)
p (torr)	n (cc/g)	ln(p/n)		p (torr)	n (cc/g)	ln(p/n)		p (torr)	n (cc/g)	ln(p/n)		p (torr)	n (cc/g)	ln(p/n)
7.55	0.4721	2.77211		7.71486	0.3466	3.10273		7.72447	0.2386	3.47736		7.72238	0.15	3.94124
12.9	0.7571	2.83549		13.5121	0.5619	3.18002		12.3223	0.3599	3.53334		13.041	0.2395	3.9973
19.9	1.1046	2.89124		20.7098	0.8149	3.23529		21.1195	0.5801	3.59475		20.1001	0.3471	4.05887
29.3	1.5437	2.94341		31.1011	1.1616	3.28745		32.6505	0.8544	3.64322		33.9923	0.5613	4.10363
37.9	1.9253	2.97987		39.9289	1.4449	3.31906		41.5794	1.0604	3.66896		43.1341	0.6984	4.12328
46.1	2.2702	3.01095		48.1333	1.6933	3.34729		49.661	1.2397	3.69035		51.0853	0.8129	4.14064
54.1	2.5873	3.04022		55.8838	1.9264	3.36762		57.3247	1.4074	3.70699		58.6619	0.9214	4.15365
62	2.887	3.06692		63.6256	2.1481	3.38843		64.869	1.569	3.72193		66.1802	1.0282	4.16457
69.7	3.1702	3.09041		71.225	2.3604	3.40701		72.4454	1.727	3.73645		73.6174	1.1327	4.17428
77.5	3.4404	3.11469		78.7827	2.5658	3.42442		79.9848	1.8798	3.75067		81.1519	1.2346	4.18558
85.1	3.7015	3.13509		86.4348	2.7662	3.44192		87.4686	2.0306	3.76295		88.6051	1.3366	4.19406
118	4.7279	3.2172		119.952	3.5989	3.50647		113.942	2.5408	3.80321		116.857	1.7131	4.22265
153	5.6905	3.29164		154.807	4.3844	3.56412		155.562	3.2893	3.85637		150.449	2.1355	4.25492
188	6.556	3.35606		189.907	5.1064	3.61604		183.595	3.7589	3.88861		184.99	2.5526	4.28319
223	7.3421	3.41355		225.389	5.7751	3.66427		225.71	4.4179	3.93359		219.7	2.9551	4.30873
259	8.0685	3.46886		252.288	6.2559	3.69705		253.782	4.8328	3.96105		254.637	3.3403	4.33378
294	8.7317	3.51662		293.649	6.9549	3.74294		287.038	5.3015	3.99163		289.334	3.7128	4.3558
321	9.2219	3.54986		321.959	7.3966	3.7734		321.6	5.7656	4.0214		324.126	4.0708	4.37729
362	9.9268	3.59641		355.035	7.8959	3.80587		356.455	6.2108	4.04992		358.78	4.4203	4.3965
391	10.3759	3.62922		389.544	8.3903	3.8379		391.275	6.64	4.0763		393.834	4.7495	4.41789
433	11.0134	3.67163		424.692	8.8636	3.86941		426.166	7.051	4.10166		428.2	5.0778	4.43471
461	11.4224	3.69782		459.465	9.3186	3.89805		461.124	7.4453	4.12608		463.201	5.3903	4.45356
494	11.881	3.7276		494.044	9.7602	3.92431		495.742	7.827	4.14848		497.599	5.6968	4.46989
528	12.3387	3.75636		529.452	10.1747	3.95194		530.589	8.1951	4.17045		532.487	5.992	4.48713
563	12.783	3.78516		564.15	10.5748	3.97685		565.463	8.5489	4.19184		567.233	6.2793	4.50351
598	13.2138	3.81233		598.873	10.9652	4.00032		600.204	8.8907	4.21226		601.684	6.5613	4.51854
633	13.6248	3.83858		633.716	11.341	4.02318		634.951	9.2228	4.23187		636.492	6.8371	4.53361
667	14.0258	3.86189		668.421	11.7037	4.04501		669.37	9.5506	4.24973		671.419	7.0978	4.54961
702	14.4105	3.88598		703.295	12.0546	4.06633		704.285	9.8634	4.26835		705.609	7.3587	4.56318
737	14.7813	3.90923		737.801	12.3979	4.08615		738.843	10.1707	4.28557		740.029	7.6223	4.57561
n(cc/g)	1/T (K)	1/T (K)	1/T (K)	1/T (K)	n(mmol/g)	DH (kJ/mol)
	0.00366099	0.0035317	0.00341122	0.00324517
2	3.6782	4.07183	4.46086	4.94566	0.0892857	25.4421
2.5	3.94968	4.34223	4.72263	5.19584	0.111607	24.9961
3	4.17688	4.56507	4.93803	5.40478	0.133929	24.6192
3.5	4.37333	4.75563	5.12312	5.58835	0.15625	24.3568
4	4.54729	4.92341	5.28757	5.75438	0.178571	24.1995
4.5	4.70422	5.07467	5.43738	5.90616	0.200893	24.1034
5	4.84786	5.21365	5.57614	6.04457	0.223214	24.0096
5.5	4.98092	5.34317	5.7059	6.16973	0.245536	23.8649
6	5.10536	5.46514	5.82768	6.28238	0.267857	23.6417
6.5	5.22263	5.58073	5.94191	6.38504	0.290179	23.3578
7	5.33383	5.69066	6.04874	6.48326	0.3125	23.0969
7.5	5.43976	5.7953	6.14835	6.58669	0.334821	23.0282
8	5.54102	5.89483	6.24126	6.71014	0.357143	23.4271
8.5	5.63806	5.98935	6.32848	6.87473	0.379464	24.6948

## Sheet: heats
Loading [cc/g]	Loading [molecules/UC]	Qst [kJ/mole]		Loading [cc/g]	Loading [molecules/UC]	Qst [kJ/mole]		Loading [cc/g]	Loading [molecules/UC]	Qst [kJ/mole]		Loading [cc/g]	Loading [molecules/UC]	Qst [kJ/mole]			UCF (cc/g) --> (molecules/UC)
1	0.26439	45.2694		1	0.26439	27.2275		5	1.32195	47.7721		2	0.52878	25.4421			0.26439
2	0.52878	45.6945		2	0.52878	27.1639		6	1.58634	46.4936		2.5	0.660975	24.9961
3	0.79317	46.0906		3	0.79317	27.0942		7	1.85073	45.2728		3	0.79317	24.6192
4	1.05756	46.4583		4	1.05756	27.0182		8	2.11512	44.1092		3.5	0.925365	24.3568
5	1.32195	46.7977		5	1.32195	26.9361		9	2.37951	43.0016		4	1.05756	24.1995
6	1.58634	47.1093		6	1.58634	26.8477		10	2.6439	41.9487		4.5	1.18976	24.1034
7	1.85073	47.3933		7	1.85073	26.7531		11	2.90829	40.9491		5	1.32195	24.0096
8	2.11512	47.6501		8	2.11512	26.6524		12	3.17268	40.001		5.5	1.45415	23.8649
9	2.37951	47.88		9	2.37951	26.5454		13	3.43707	39.1027		6	1.58634	23.6417
10	2.6439	48.0833		10	2.6439	26.4322		14	3.70146	38.2522		6.5	1.71854	23.3578
11	2.90829	48.2604		11	2.90829	26.3128		15	3.96585	37.4474		7	1.85073	23.0969
12	3.17268	48.4117		12	3.17268	26.1872		16	4.23024	36.6863		7.5	1.98293	23.0282
13	3.43707	48.5373		13	3.43707	26.0554		17	4.49463	35.9668		8	2.11512	23.4271
14	3.70146	48.6377		14	3.70146	25.9174		18	4.75902	35.2868		8.5	2.24731	24.6948
15	3.96585	48.7131		15	3.96585	25.7732		19	5.02341	34.6442
16	4.23024	48.764		16	4.23024	25.6228		20	5.2878	34.037
17	4.49463	48.7906		17	4.49463	25.4661		21	5.55219	33.4634
18	4.75902	48.7933		18	4.75902	25.3033		22	5.81658	32.9216
19	5.02341	48.7723		19	5.02341	25.1343		23	6.08097	32.4101
20	5.2878	48.7281		20	5.2878	24.959		24	6.34536	31.9274
21	5.55219	48.661		21	5.55219	24.7776		25	6.60975	31.4726
22	5.81658	48.5712		22	5.81658	24.5899		26	6.87414	31.0447
23	6.08097	48.4591		23	6.08097	24.3961		27	7.13853	30.643
24	6.34536	48.3251		24	6.34536	24.196		28	7.40292	30.2675
25	6.60975	48.1694		25	6.60975	23.9898		29	7.66731	29.9183
26	6.87414	47.9925						30	7.9317	29.5957
27	7.13853	47.7945						31	8.19609	29.3009
28	7.40292	47.5759						32	8.46048	29.0351
29	7.66731	47.337						33	8.72487	28.8003
30	7.9317	47.0781						34	8.98926	28.5989
31	8.19609	46.7996						35	9.25365	28.4338
32	8.46048	46.5017						36	9.51804	28.3086
33	8.72487	46.1848						37	9.78243	28.2275
34	8.98926	45.8492						38	10.0468	28.1952
35	9.25365	45.4953						39	10.3112	28.2174
36	9.51804	45.1233						40	10.5756	28.3
37	9.78243	44.7337						41	10.84	28.4503
38	10.0468	44.3267						42	11.1044	28.6757
39	10.3112	43.9026						43	11.3688	28.985
40	10.5756	43.4619						44	11.6332	29.3874
41	10.84	43.0048						45	11.8976	29.8932
42	11.1044	42.5316						46	12.1619	30.5137
43	11.3688	42.0427						47	12.4263	31.2607
44	11.6332	41.5384						48	12.6907	32.1475
45	11.8976	41.0191						49	12.9551	33.188
46	12.1619	40.485						50	13.2195	34.3974
47	12.4263	39.9366						51	13.4839	35.7918
48	12.6907	39.374						52	13.7483	37.3885
49	12.9551	38.7977						53	14.0127	39.2058
50	13.2195	38.208						54	14.2771	41.2633
51	13.4839	37.6052						55	14.5415	43.5817
52	13.7483	36.9896
53	14.0127	36.3616
54	14.2771	35.7215
55	14.5415	35.0696
56	14.8058	34.4062
57	15.0702	33.7318
58	15.3346	33.0465
59	15.599	32.3508
60	15.8634	31.645
